# Supplementary material for: CD81 inhibits the proliferation of acute megakaryoblastic leukemia cells
Source: PeerJ. 2025 Nov 5;13:e20286. doi: 10.7717/peerj.20286 (PMC12595947; doi:10.7717/peerj.20286)
Supplement: Supplemental Information 1 [file peerj-13-20286-s001.xlsx]

## Sheet: Sheet1
		Sequence
(5'->3')	CD81-siRNA-1:CD81-human-498-S	CCUCAGUGCUCAAGAACAAUUTT
	CD81-siRNA-1:CD81-human-498-A	AAUUGUUCUUGAGCACUGAGGTT
	CD81-siRNA-2:CD81-human-168-S	CCUUCUAUGUAGGCAUCUACATT
	CD81-siRNA-2:CD81-human-168-A	UGUAGAUGCCUACAUAGAAGGTT
	CD81-siRNA-3:CD81-human-636-S	CUGUGAUCAUGAUCUUCGAGATT
	CD81-siRNA-3:CD81-human-636-A	UCUCGAAGAUCAUGAUCACAGTT
Primer:	Cd81（human）-RT-F	TGACCCGCAGACCACCAAC
	Cd81（human）-RT-R	GCCCAGGAAGCCAACGAAC
	Gapdh (human)-RT-F	GGAGCGAGATCCCTCCAAAAT
	Gapdh (human)-RT-R	GGCTGTTGTCATACTTCTCATGG
