# Supplementary material for: CD81 inhibits the proliferation of acute megakaryoblastic leukemia cells
Source: PeerJ. 2025 Nov 5;13:e20286. doi: 10.7717/peerj.20286 (PMC12595947; doi:10.7717/peerj.20286)
Supplement: Supplemental Information 2 [file peerj-13-20286-s002.xlsx]

## Sheet: Sheet1
	MIQE checklist
	Item to check	Importance		Location	Item to check	Importance		Location
	Experimental design				qPCR oligonucleotides
	Definition of experimental and control groups	E	√	Line 88-89, Line 97-98	Primer sequences	E	√	sup.The sequences of CD81-siRNA and primers
	Number within each group	E	√	sup. Figure1, sup. Figure3	RTPrimerDB identification number	D
	Assay carried out by the core or investigator's laboratory?	D			Probe sequences	D	√	sup.The sequences of CD83-siRNA and primers
	Acknowledgment of authors’ contributions	D		Line 42	Location and identity of any modifications	E	√	sup.The sequences of CD84-siRNA and primers
	Sample				Manufacturer of oligonucleotides	D
	Description	E	√		Purification method	D
	Volume/mass of sample processed	D			qPCR protocol
	Microdissection or macrodissection	E	√	Figure 2	Complete reaction conditions	E	√	Line 56-61
	Processing procedure	E	√	Line 42-46	Reaction volume and amount of cDNA/DNA	E	√	Line 56-62
	If frozen, how and how quickly?	E	√	not frozen	Primer, (probe), Mg2+, and dNTP concentrations	E	√	Line 56-63
	If fixed, with what and how quickly?	E	√	not fixed	Polymerase identity and concentration	E	√	Line 56-64
	Sample storage conditions and duration (especially for FFPEb samples)	E	√	Line 46	Buffer/kit identity and manufacturer	E	√	Line 56-65
	Nucleic acid extraction				Exact chemical composition of the buffer	D
	Procedure and/or instrumentation	E	√	Line 56-57	Additives (SYBR Green l, DMSO, and so forth)	E	√	Line 56-67
	Name of kit and details of any modifications	E	√	Line 56	Manufacturer of plates/tubes and catalog number	D
	Source of additional reagents used	D	√	Line 56	Complete thermocycling parameters	E	√	Line 56-69
	Details of DNase or RNase treatment	E	√	Line 57-58	Reaction setup (manual/robotic)	D
	Contamination assessment (DNA or RNA)	E	√	Line 57-58	Manufacturer of qPCR instrument	E	√	Line 56-71
	Nucleic acid quantification	E	√	Line 61	qPCR validation
	Instrument and method	E	√	Line 57	Evidence of optimization (from gradients)	D
	Purity (A260/A280)	D			Specificity (gel, sequence, melt, or digest)	E	√	Line 60
	Yield	D			For SYBR Green l, Cq of the NTC	E	√	Line 60
	RNA integrity: method/instrument	E	√	Line 57-58	Calibration curves with slope and y intercept	E	√	Line 60
	RIN/RQI or Cq of 3' and 5'_x005f_x0002_transcripts	E	√	Line 59	PCR efficiency calculated from slope	E	√	Line 60
	Electrophoresis traces	D			Cls for PCR efficiency or SE	D
	Inhibition testing (Cq dilutions, spike, or other)	E		Line 57-60	r2 of calibration curve	E	√	Line 60
	Reverse transcription				Linear dynamic range	E	√	Line 60
	Complete reaction conditions	E	√	Line 60	Cq variation at LOD	E	√	Line 60
	Amount of RNA and reaction volume	E	√	Line 60	CIs throughout range	D
	Priming oligonucleotide (if using GSP) and concentration	E	√	Line 60	Evidence for LOD	E	√	Line 60
	Reverse transcriptase and concentration	E	√	Line 60	If multiplex, efficiency and LOD of each assay	E	√	Line 60
	Temperature and time	E	√	Line 60	Data analysis
	Manufacturer of reagents and catalogue numbers	D			qPCR analysis program (source, version)	E	√	Line 61
	Cqs with and without reverse transcription	D			Method of Cq determination	E	√	Line 61
	Storage conditions of cDNA	D	√	Line 60	Outlier identification and disposition	E	√	Line 61
	qPCR target information				Results for NTCS	E	√	Line 61
	Gene symbol	E	√	sup.The sequences of CD81-siRNA and primers	Justification of number and choice of reference genes	E	√	Line 61
	Sequence accession number	E	√	sup.The sequences of CD81-siRNA and primers	Description of normalization method	E	√	Line 61
	Location of amplicon	D			Number and concordance of biological replicates	D
	Amplicon length	E	√	sup.The sequences of CD81-siRNA and primers	Number and stage (reverse transcription or qPCR) of technical replicates	E	√	sup. Figure1, sup.Figure3
	In silico specificity screen (BLAST, and so on)	E	√	sup.The sequences of CD81-siRNA and primers	Repeatability (intraassay variation)	E	√	sup. Figure1, sup.Figure3
	Pseudogenes, retropseudogenes, or other homologs?	D			Reproducibility (interassay variation, CV)	D
	Sequence alignment	D	√	sup.The sequences of CD81-siRNA and primers	Power analysis	D	√	sup. Figure1, sup.Figure3
	Secondary structure analysis of amplicon	D	√	sup.The sequences of CD81-siRNA and primers	Statistical methods for results significance	E	√	sup. Figure1, sup.Figure3
	Location of each primer by exon or intron (if applicable)	E	√	sup.The sequences of CD81-siRNA and primers	Software (source, version)	E	√	sup. Figure1, sup.Figure3
	What splice variants are targeted?	E	√	sup.The sequences of CD81-siRNA and primers	Cq or raw data submission with RDML	D
	PS. sup. refers to supplementary. If not otherwise mentioned, the line refer to line in the manuscript.
